# Supplementary material for: The Use of Coded PCR Primers Enables High-Throughput Sequencing of Multiple Homolog Amplification Products by 454 Parallel Sequencing
Source: PLoS One. 2007 Feb 14;2(2):e197. doi: 10.1371/journal.pone.0000197 (PMC1797623; doi:10.1371/journal.pone.0000197)
Supplement: Table S1 — DNA concentrations of original PCR products (0.04 MB XLS) [file pone.0000197.s001.xls]

## Sheet: Sheet1
Supplementary table S1: DNA concentrations of original PCR products
	DNA source
Primer 5' tag	Wolf	Cheetah	Hippopotamus	Lion	Saiga	Gibbon	Whale	Mouse	Musk Ox	Human	Zebra	Buffalo1	Buffalo2	Impala
AA	5,7ng/µL	4,6ng/µL	8,3ng/µL
AC	5,8ng/µL	5,8ng/µL	10,2ng/µL
AG	9,5ng/µL	3,8ng/µL	18,4ng/µL
AT	6,6ng/µL	4,7ng/µL	26,1ng/µL
TA				6,1ng/µL	6,8ng/µL	6,9ng/µL					15,0ng/µL
TC				6,5ng/µL	6,0ng/µL	16,6ng/µL					4,5ng/µL
TG				5,1ng/µL	6,2ng/µL	16,4ng/µL					16,3ng/µL
TT				6,0ng/µL	3,8ng/µL	7,5ng/µL					4,8ng/µL
GA							10,1ng/µL	12,7ng/µL	12,8ng/µL	9,3ng/µL
GC							11,1ng/µL	12,5ng/µL	13,0ng/µL	10,0ng/µL
GG							8,1ng/µL	11,4ng/µL	14,8ng/µL	7,4ng/µL
GT							9,4ng/µL	10,6ng/µL	11,4ng/µL	9,2ng/µL
CA											9,5ng/µL	8,3ng/µL	9,8ng/µL	9,8ng/µL
CC											8,9ng/µL	6,8ng/µL	9,6ng/µL	9,2ng/µL
CG											9,5ng/µL	8,3ng/µL	11,0ng/µL	10,1ng/µL
CT											7,6ng/µL	6,7ng/µL	10,0ng/µL	8,6ng/µL
16S4A											9,1ng/µL	7,3ng/µL
16S4B	17,5ng/µL										26,0ng/µL	14,0ng/µL
16S4C	13,9ng/µL										12,5ng/µL	14,8ng/µL
