# Supplementary material for: The Use of Coded PCR Primers Enables High-Throughput Sequencing of Multiple Homolog Amplification Products by 454 Parallel Sequencing
Source: PLoS One. 2007 Feb 14;2(2):e197. doi: 10.1371/journal.pone.0000197 (PMC1797623; doi:10.1371/journal.pone.0000197)
Supplement: Table S2 — Blast Results for the 81 sequences that have an exact primer match but are >1 nucleotide offset from 5′ end of the sequence. (0.05 MB XLS) [file pone.0000197.s002.xls]

## Sheet: Sheet1
Supplementary table S2.
Blast Results for the 81 sequences that have an exact primer match but are >1 nucleotide offset from 5' end of the sequence.
Species shown in green are those included in the study (when these species are found with ties in the score only they are reported).
Summary Table					Raw data
	LATIN NAME	COMMON NAME	COUNTS		454 SEQ ID	SPECIES	ACCESSION	PRIMER NT OFFSET	E-VALUE SCORE
	Equus hemionus	Zebra	20		004131_1817_3430	Mus domesticus	L07096	1	4.82868e-59
	Mus domesticus	Mouse	8		009089_1946_0358	Canis lupus	DQ480508	1	1.0846e-47
	Syncerus caffer	Cape Buffalo	8			Canis familiaris	DQ480502	1	1.0846e-47
	Acinonyx jubatus	Cheetah	7			Canis aureus	AY289969	1	1.0846e-47
	Canis lupus	Wolf	7		008429_1831_2541	Canis lupus	DQ480508	3	8.00553e-58
	Monodon monoceros	Narwhal	7			Canis familiaris	DQ480502	3	8.00553e-58
	Aepyceros melampus	Impala	6			Canis aureus	AY289969	3	8.00553e-58
	Ovibos moschatus	Musk Ox	5		000683_1625_3057	Acinonyx jubatus	AY463959	1	4.41149e-56
	Homo sapiens	Human	4		000187_1905_0415	Homo sapiens	DQ523681	1	4.01843e-53
	Saiga tatarica	Saiga Antelope	4		001148_1697_0777	Canis lupus	DQ480508	12	4.43413e-53
	Hippopotamus amphibius	Hippopotamus	2			Canis familiaris	DQ480502	12	4.43413e-53
	Hylobates agilis+Hylobates muelleri	Agile+Müller's Bornean Gibbon	2			Canis aureus	AY289969	12	4.43413e-53
	Kobus ellipsiprymnus	Waterbuck	1		000400_1677_0416	Equus asinus	X97337	30	2.15042e-36
						Equus caballus	X79547	30	2.15042e-36
		Total =	80			Equus hemionus	Z18645	30	2.15042e-36
		Grand Total =	81		008582_1949_1890	Acinonyx jubatus	AY463959	1	9.29822e-45
		Percent Green =	98.7654		001498_1595_2158	Syncerus caffer	U87061	10	2.1152e-45
					002994_1665_2817	Homo sapiens	DQ523681	1	1.49432e-49
					000311_1664_0408	Ovibos moschatus	U87027	1	1.4664e-65
					001036_1890_0473	Aepyceros melampus	M86496	1	1.27089e-23
					001706_1696_1449	Equus caballus	X79547	1	4.20319e-53
						Equus hemionus	Z18645	1	4.20319e-53
					000288_1582_0942	Ovibos moschatus	U87027	1	1.47998e-65
					001710_1683_3101	Hylobates muelleri	AB050179	1	8.88032e-45
						Hylobates agilis	AB050174	1	8.88032e-45
					010314_1949_2179	Equus caballus	X79547	2	6.39089e-49
						Equus hemionus	Z18645	2	6.39089e-49
					000269_1911_3692	Syncerus caffer	U87061	13	3.34024e-41
					000201_1872_3713	Aepyceros melampus	U87014	10	9.19374e-45
					007351_1900_0635	Hippopotamus amphibius	AJ010957	13	2.27384e-45
					003654_1697_2522	Syncerus caffer	U87061	1	7.46147e-58
					001133_1913_3623	Equus caballus	X79547	1	1.64258e-52
						Equus hemionus	Z18645	1	1.64258e-52
					001590_1906_3746	Equus caballus	X79547	1	3.00973e-57
						Equus hemionus	Z18645	1	3.00973e-57
					003325_1698_2319	Acinonyx jubatus	AY463959	13	3.34382e-44
					003415_1917_0570	Acinonyx jubatus	AY463959	1	3.15643e-60
					000809_1578_3701	Ovibos moschatus	U87027	1	8.79553e-64
					002542_1896_3295	Monodon monoceros	AF334502	1	3.15643e-60
					008523_1881_1540	Mus domesticus	L07096	1	7.33701e-55
					001190_1378_1630	Mus domesticus	L07096	1	1.12858e-56
					000728_1357_1398	Aepyceros melampus	M86496	1	2.06246e-61
					002842_1568_3171	Equus caballus	X79547	1	4.20319e-53
						Equus hemionus	Z18645	1	4.20319e-53
					010117_1815_2173	Canis lupus	DQ480508	1	2.86954e-54
						Canis familiaris	DQ480502	1	2.86954e-54
						Canis aureus	AY289969	1	2.86954e-54
					008021_1814_1807	Equus caballus	X79547	1	7.33701e-55
						Equus hemionus	Z18645	1	7.33701e-55
					000962_1818_3618	Equus caballus	X79547	1	1.64258e-52
						Equus hemionus	Z18645	1	1.64258e-52
					005579_1950_1862	Mus domesticus	L07096	1	7.33701e-55
					004259_1850_0452	Saiga tatarica	U87053	13	5.62073e-46
					005387_1894_3047	Homo sapiens	DQ523681	1	4.01843e-53
					000239_1902_0290	Saiga tatarica	U87053	1	8.00553e-58
					005714_1828_2763	Equus caballus	X79547	13	3.59151e-44
						Equus hemionus	Z18645	13	3.59151e-44
					000345_1688_0453	Aepyceros melampus	M86496	10	6.6347e-52
					000924_1328_1316	Equus caballus	X79547	1	1.64258e-52
						Equus hemionus	Z18645	1	1.64258e-52
					008576_1895_3157	Equus caballus	X79547	1	1.64258e-52
						Equus hemionus	Z18645	1	1.64258e-52
					000314_1696_2760	Ovibos moschatus	U87027	1	1.4664e-65
					007907_1839_0627	Equus caballus	X79547	13	4.84271e-40
						Equus hemionus	Z18645	13	4.84271e-40
					000361_1948_2575	Monodon monoceros	AF334502	1	3.15643e-60
					000495_1842_3710	Acinonyx jubatus	AY463959	13	3.3851e-44
					006479_1830_3237	Syncerus caffer	U87061	1	4.41149e-56
					002145_1574_0412	Saiga tatarica	U87053	1	5.27129e-62
					002639_1872_2070	Monodon monoceros	AF334502	1	7.38374e-58
					005056_1905_0706	Mus domesticus	L07096	1	4.82868e-59
					000156_1579_3003	Mus domesticus	L07096	1	1.23462e-59
					000909_1861_3125	Syncerus caffer	U87061	1	6.70681e-52
					008407_1941_1831	Canis lupus	DQ480508	10	5.82147e-46
						Canis familiaris	DQ480502	10	5.82147e-46
						Canis aureus	AY289969	10	5.82147e-46
					005703_1904_1915	Acinonyx jubatus	AY463959	1	3.15643e-60
					000200_1885_3764	Homo sapiens	DQ523681	1	1.49432e-49
					006138_1889_2985	Canis lupus	DQ480508	1	2.06246e-61
						Canis familiaris	DQ480502	1	2.06246e-61
						Canis aureus	AY289969	1	2.06246e-61
					000582_1942_0351	Kobus ellipsiprymnus	U87015	3	2.08298e-30
					001017_1423_3324	Syncerus caffer	U87061	2	2.88688e-57
					011311_1813_2106	Mus domesticus	L07096	1	1.12858e-56
					000360_1596_2958	Equus caballus	X79547	1	3.82627e-50
						Equus hemionus	Z18645	1	3.82627e-50
					006432_1903_1718	Equus caballus	X79547	13	3.18118e-41
						Equus hemionus	Z18645	13	3.18118e-41
					004416_1935_2104	Hippopotamus amphibius	AJ010957	1	7.69464e-58
					007857_1931_1259	Monodon monoceros	AF334502	12	2.62162e-51
					005985_1948_0711	Equus caballus	X79547	1	9.796e-51
						Equus hemionus	Z18645	1	9.796e-51
					006457_1936_3614	Equus caballus	X79547	1	3.79792e-44
						Equus hemionus	Z18645	1	3.79792e-44
					004378_1863_0848	Aepyceros melampus	M86496	1	5.22692e-59
					009942_1938_1807	Monodon monoceros	AF334502	30	1.81987e-30
					000861_1910_3757	Syncerus caffer	U87061	2	3.72852e-47
					008298_1820_2153	Monodon monoceros	AF334502	14	3.3851e-44
					000493_1378_1772	Acinonyx jubatus	AY463959	10	3.26126e-44
					000892_1370_1569	Equus caballus	X79547	13	3.50895e-44
						Equus hemionus	Z18645	13	3.50895e-44
					000449_1358_2256	Syncerus caffer	U87061	10	2.1152e-45
					005067_1838_1645	Mus domesticus	L07096	1	1.12858e-56
					006650_1943_1035	Canis lupus	DQ480508	3	2.63507e-48
						Canis familiaris	DQ480502	3	2.63507e-48
						Canis aureus	AY289969	3	2.63507e-48
					007108_1817_1729	Equus caballus	X79547	10	8.5669e-45
						Equus hemionus	Z18645	10	8.5669e-45
					002742_1880_1957	Saiga tatarica	U87053	1	5.27129e-62
					006272_1837_2484	Ovibos moschatus	AF538357	1	1.39943e-62
					003767_1681_3099	Hylobates muelleri	AB050179	1	8.88032e-45
						Hylobates agilis	AB050174	1	8.88032e-45
					000324_1668_1480	Equus caballus	X79547	1	3.82627e-50
						Equus hemionus	Z18645	1	3.82627e-50
					001137_1354_0809	Monodon monoceros	AF334502	1	3.15643e-60
					003013_1946_2071	Aepyceros melampus	M86496	1	2.83996e-54
					004014_1916_2586	Equus caballus	X79547	1	4.20319e-53
						Equus hemionus	Z18645	1	4.20319e-53
