# Supplementary material for: The Use of Coded PCR Primers Enables High-Throughput Sequencing of Multiple Homolog Amplification Products by 454 Parallel Sequencing
Source: PLoS One. 2007 Feb 14;2(2):e197. doi: 10.1371/journal.pone.0000197 (PMC1797623; doi:10.1371/journal.pone.0000197)
Supplement: Table S4 — Blast Results for the 665 sequences that had an exact primer match but were excluded because of more than 1 mismatch with reference sequences. (0.17 MB XLS) [file pone.0000197.s004.xls]

## Sheet: Sheet1
Supplementary table S4.
Blast Results for the 665 sequences that had an exact primer match but were excluded because of more than 1 mismatch with reference sequences.
Notes
Species shown in red have no support (E-value > 1.0x10^-5) but are the best matches.
Species shown in green are those included in the study (when these species are found with ties in the score only they are reported).
In the summary table species that united by a + were found together as equally good mathces.
	Summary Table				Raw Data
	LATIN NAME	COMMON NAME	COUNTS		454 SEQ ID	SPECIES	ACCESSION	E-VALUE SCORE
	Ovibos moschatus	Musk Ox	122		000658_1356_1254	Saiga tatarica	AF400656	1.60294e-43
	Canis lupus	Wolf	95		000706_1185_3659	Aepyceros melampus	M86496	4.51225e-47
	Syncerus caffer	Cape Buffalo	69		000373_1591_0277	Canis lupus	DQ480508	2.98717e-57
	Aepyceros melampus	Impala	52			Canis familiaris	DQ480502	2.98717e-57
	Saiga tatarica	Saiga Antelope	43			Canis aureus	AY289969	2.98717e-57
	Equus hemionus	Zebra	35		001423_1447_2674	Saiga tatarica	U87053	4.77047e-53
	Acinonyx jubatus	Cheetah	18		000243_1072_3039	Hylobates muelleri	AB050179	3.30311e-38
	Mus domesticus	Mouse	18			Hylobates agilis	AB050174	3.30311e-38
	Hippopotamus amphibius	Hippopotamus	14		000223_1909_0422	Tetracerus quadricornis	AY256829	2.26317e-39
	Kobus ellipsiprymnus	Waterbuck	14		002541_1428_0369	Kogia simus	AF334490	1.40341e-34
	Monodon monoceros	Narwhal	13		001118_1858_1974	Equus caballus	X79547	9.64843e-35
	Tetracerus quadricornis		12			E hemionus	Z18645	9.64843e-35
	Equus caballus	Domestic Horse	6		009063_1881_1773	Aepyceros melampus	M86496	5.91431e-40
	Balaena mysticetus	Bowhead Whale	6		001714_1634_0866	Thoopterus nigrescens	AF293646	1.59022e-09
	Loxodonta africana		6		003142_1587_3520	Canis lupus	DQ480508	2.68594e-51
	Kogia simus		5			Canis familiaris	DQ480502	2.68594e-51
	Delphinapterus leucas		5			Canis aureus	AY289969	2.68594e-51
	Neofelis nebulosa		5		004861_1903_3508	Aepyceros melampus	M86496	4.72415e-53
	Rhinopoma hardwickei		4		001636_1570_3011	Delphinapterus leucas	AF334501	4.19365e-50
	Thoopterus nigrescens		4		006630_1886_1366	Prionailurus rubiginosa	AF006445	2.8029e-23
	Homo sapiens	Human	3		002588_1878_3145	Tetracerus quadricornis	AY256829	1.56221e-46
	Prionailurus bengalensis		3		002831_1920_2397	Canis lupus	DQ480508	7.35709e-55
	Prionailurus planiceps		3			Canis familiaris	DQ480502	7.35709e-55
	Rhinolophus alcyone		3			Canis aureus	AY289969	7.35709e-55
	Oncifelis colocolo	Pampas Cat	2		000556_1372_1877	Panthera tigris	AY452109	1.78046e-49
	Capra falconeri		2			16S rRNA	S75063	1.78046e-49
	Camelus bactrianus		2			Felis catus	U20753	1.78046e-49
	Mus musculus		2			Panthera leo	AF006457	1.78046e-49
	Pontoporia blainvillei		2			Leopardus wiedii	AF006423	1.78046e-49
	Prionailurus rubiginosa		2			Oncifelis colocolo	AF006411	1.78046e-49
	Canis familiaris		1			Felis silvestris	AF006401	1.78046e-49
	Capricornis crispus		1			Felis libyca	AF006395	1.78046e-49
	Capricornis sumatraensis		1
	Felis nigripes		1			Felis chaus	AF006393	1.78046e-49
	Felis pardalis		1		009151_1819_0924	Equus caballus	X79547	2.92226e-32
	Kogia breviceps		1			E hemionus	Z18645	2.92226e-32
	Lynx lynx		1		002452_1876_3767	Aepyceros melampus	M86496	1.86669e-52
	Molossops abrasus		1		002661_1903_0853	Monodon monoceros	AF334502	1.22901e-56
	Muntiacus feae		1		000058_1905_3757	Ovibos moschatus	U87027	1.71735e-40
	Prionailurus viverrinus		1		001434_1615_3333	Ovibos moschatus	U87027	1.41638e-62
	Syconycteris australis		1		002130_1916_3625	Leptobrachium hasseltii	AY561305	3.4679e-10
	Panthera tigris	Tiger	1			Litoria coplandi	DQ116865	3.4679e-10
	MULTIPLE MATCHES					Litoria nasuta	DQ116862	3.4679e-10
	All others		68			Leptobrachium chapaense	AF285191	3.4679e-10
	Hylobates agilis+Hylobates muelleri	Agile+Müller's Bornean Gibbon	9		000481_1641_0449	Canis lupus	DQ480508	2.8774e-54
	No supported match	NA	6			Canis familiaris	DQ480502	2.8774e-54
						Canis aureus	AY289969	2.8774e-54
		Total =	491		000057_1639_0286	Neophocaena phocaenoides	AF334503	5.00054e-56
		Grand Total =	665			Delphinapterus leucas	AF334501	5.00054e-56
		Percent Green =	73.8346		000664_1645_0311	Oncifelis colocolo	AF006411	1.09844e-47
					007953_1825_2664	Syncerus caffer	U87061	2.47714e-48
					007404_1865_2633	Aepyceros melampus	M86496	8.94261e-39
					007901_1867_2347	Ovibos moschatus	U87027	7.71569e-58
					002712_1917_3698	Saiga tatarica	U87053	6.16333e-40
					006438_1948_1959	Mus domesticus	L07096	4.3721e-50
					000253_1934_0337	Hylobates muelleri	AB050179	1.84684e-30
						Hylobates agilis	AB050174	1.84684e-30
					001589_1339_0912	Syncerus caffer	U87061	2.1563e-36
					004267_1943_3207	Neotoma micropus	DQ179750	3.44506e-08
						Neotoma mexicana	DQ179747	3.44506e-08
						Neotoma macrotis	DQ179742	3.44506e-08
						Neotoma leucodon	DQ179739	3.44506e-08
						Neotoma lepida	DQ179735	3.44506e-08
						Neotoma fuscipes	DQ179724	3.44506e-08
						Nycticebus coucang	AY773981	3.44506e-08
						Phyllomedusa hypochondrialis	AY843724	3.44506e-08
						Hybomys univittatus	AF141250	3.44506e-08
						Aethomys namaquensis	AF141246	3.44506e-08
						Rhabdomys pumilio	AF141244	3.44506e-08
					001451_1951_1671	Syconycteris australis	AF293650	7.49653e-24
					011137_1946_3245	Syncerus caffer	U87061	4.21144e-47
					002275_1849_2395	Canis lupus	DQ480508	6.9421e-52
						Canis familiaris	DQ480502	6.9421e-52
						Canis aureus	AY289969	6.9421e-52
					006999_1943_1463	Aepyceros melampus	M86496	2.28777e-39
					008496_1948_1361	Ovibos moschatus	U87027	7.30367e-52
					005059_1846_0347	Panthera tigris	AY452109	1.63013e-46
						Panthera leo	AF006457	1.63013e-46
						Leopardus wiedii	AF006423	1.63013e-46
					000362_1070_2471	Acinonyx jubatus	AY463959	2.50466e-48
					002497_1582_0538	Canis lupus	DQ480508	4.5678e-56
						Canis familiaris	DQ480502	4.5678e-56
						Canis aureus	AY289969	4.5678e-56
					001511_1179_1285	Aepyceros melampus	M86496	2.91453e-51
					009338_1815_2706	Mus musculus	AY999076	4.10697e-41
						Mus Musculus	DQ106413	4.10697e-41
						Mouse mitochondrion	J01420	4.10697e-41
						Mus domesticus	L07096	4.10697e-41
						Mouse mitochondrial	V00665	4.10697e-41
					003594_1937_2859	Acinonyx jubatus	AY463959	2.50466e-48
						Lynx canadensis	AY499298	2.50466e-48
					001274_1440_2788	Ovibos moschatus	AF538357	3.01796e-57
					000495_1354_2092	Mus musculus	AC129553	1.88427e-10
					006190_1837_1956	Loxodonta africana	DQ316069	1.89349e-58
					003914_1945_1338	Tetracerus quadricornis	AY256829	1.56221e-46
					001206_1325_2177	Ovibos moschatus	AF538357	1.33906e-59
					003271_1834_1954	Syncerus caffer	U87061	5.36437e-43
					007452_1916_1196	Aepyceros melampus	M86496	1.17213e-53
					005118_1946_0620	Aepyceros melampus	U87014	8.94261e-39
					000891_1418_1218	Ovibos moschatus	AF538357	4.77047e-53
					002779_1949_2352	Syncerus caffer	U87061	1.84839e-52
					002125_1682_3134	Canis lupus	DQ480508	2.8774e-54
						Canis familiaris	DQ480502	2.8774e-54
						Canis aureus	AY289969	2.8774e-54
					011046_1815_2749	Aepyceros melampus	M86496	1.70995e-49
					006788_1947_1686	Syncerus caffer	U87061	6.89597e-49
					000361_1138_1248	Hippopotamus amphibius	AJ010957	1.78046e-49
					001830_1847_1019	Neofelis nebulosa	DQ257669	1.87196e-36
						Lynx lynx	AY499291	1.87196e-36
					000061_1116_3029	Syncerus caffer	U87061	3.99657e-47
					000073_1926_3698	Delphinapterus leucas	AF334501	2.99605e-54
					007205_1824_2362	Monodon monoceros	AF334502	2.19119e-33
					001102_1938_2802	Ovibos moschatus	U87027	7.01442e-52
						Capricornis crispus	U87029	7.01442e-52
					000064_1134_0317	Saiga tatarica	U87053	4.3721e-50
					003085_1587_2797	Human germline	U66061	4.02943e-53
					001652_1939_3024	Sus scrofa	DQ268530	5.28571e-62
						Sus philippensis	AY920912	5.28571e-62
					006608_1825_0302	Syncerus caffer	U87061	3.99657e-47
					003647_1827_2259	Ovibos moschatus	U87027	2.1499e-58
					000838_1315_0975	Canis latrans	DQ480511	1.68108e-46
						Canis lupus	DQ480508	1.68108e-46
						Canis familiaris	DQ480502	1.68108e-46
						Canis aureus	AY289969	1.68108e-46
					000080_1118_3561	Capricornis sumatraensis	DQ989294	6.687e-49
						Ovibos moschatus	AF538357	6.687e-49
					010794_1819_2166	Panthera tigris	AY452109	4.30504e-44
						16S rRNA	S75063	4.30504e-44
						Felis catus	U20753	4.30504e-44
						Panthera leo	AF006457	4.30504e-44
						Leopardus wiedii	AF006423	4.30504e-44
						Oncifelis colocolo	AF006411	4.30504e-44
						Felis silvestris	AF006401	4.30504e-44
						Felis libyca	AF006395	4.30504e-44
						Felis chaus	AF006393	4.30504e-44
					000336_1651_3270	Canis lupus	DQ480508	2.8774e-54
						Canis familiaris	DQ480502	2.8774e-54
						Canis aureus	AY289969	2.8774e-54
					006687_1826_0984	Syncerus caffer	U87061	6.10108e-40
					002502_1638_0778	Monodon monoceros	AF334502	3.97389e-44
					000989_1611_1396	Hylobates muelleri	AB050179	5.49363e-43
						Hylobates agilis	AB050174	5.49363e-43
					006052_1834_0469	Ovibos moschatus	AF538357	3.01796e-57
					009223_1924_1513	Felis nigripes	AF006399	5.2772e-37
					000453_1893_3759	Capricornis crispus	U87029	4.3721e-50
					001128_1684_3567	Prionailurus bengalensis	AF006437	1.14027e-34
					000151_1663_3649	Saiga tatarica	U87053	6.44127e-46
					007507_1829_1658	Ovibos moschatus	AF538357	1.33906e-59
					004257_1931_3736	Aepyceros melampus	U87014	6.61734e-49
					001962_1945_1067	Equus asinus	X97337	1.52927e-33
						Equus caballus	X79547	1.52927e-33
						E hemionus	Z18645	1.52927e-33
					002328_1594_1361	Syncerus caffer	U87061	3.99657e-47
					007564_1871_3511	Canis lupus	DQ480508	1.75688e-52
						Canis familiaris	DQ480502	1.75688e-52
						Canis aureus	AY289969	1.75688e-52
					002510_1593_3150	Neophocaena phocaenoides	AF334503	2.74308e-51
						Delphinapterus leucas	AF334501	2.74308e-51
					009083_1947_1465	Canis latrans	DQ480511	1.08951e-44
						Canis lupus	DQ480508	1.08951e-44
						Canis familiaris	DQ480502	1.08951e-44
						Canis aureus	AY289969	1.08951e-44
					007588_1842_1972	Panthera tigris	AY452109	1.78046e-49
						16S rRNA	S75063	1.78046e-49
						Felis catus	U20753	1.78046e-49
						Panthera leo	AF006457	1.78046e-49
						Leopardus wiedii	AF006423	1.78046e-49
						Oncifelis colocolo	AF006411	1.78046e-49
						Felis silvestris	AF006401	1.78046e-49
						Felis libyca	AF006395	1.78046e-49
						Felis chaus	AF006393	1.78046e-49
					007506_1933_1506	Ovibos moschatus	U87027	7.59293e-52
					001980_1823_3223	Ovibos moschatus	U87027	1.41638e-62
					003784_1652_2152	Hippopotamus amphibius	AJ010957	9.38468e-42
					008191_1918_3044	Cephalophus maxwellii	U87016	1.56221e-46
						Oryx gazella	M86500	1.56221e-46
						Cephalophus maxwelli	M86498	1.56221e-46
					000264_1082_2966	Saiga tatarica	U87053	6.64256e-46
					008784_1930_2456	Aepyceros melampus	M86496	3.11471e-54
					002154_1583_1924	Ovibos moschatus	AF538357	3.01796e-57
					008398_1868_3533	Aepyceros melampus	U87014	1.52116e-43
					002780_1692_1084	Canis lupus	DQ480508	2.8774e-54
						Canis familiaris	DQ480502	2.8774e-54
						Canis aureus	AY289969	2.8774e-54
					008665_1941_3315	Canis lupus	DQ480508	2.28777e-39
						Canis familiaris	DQ480502	2.28777e-39
						Canis aureus	AY289969	2.28777e-39
					008566_1823_2380	Ovibos moschatus	U87027	7.71569e-58
					000411_1123_1325	Aepyceros melampus	M86496	1.86669e-52
					002486_1602_3587	Panthera tigris	AY452109	1.17213e-53
						Panthera leo	AF006457	1.17213e-53
						Leopardus wiedii	AF006423	1.17213e-53
					000639_1443_2407	Balaena mysticetus	AP006472	4.55575e-28
					000370_1124_2917	Ovibos moschatus	U87027	4.80821e-56
					002415_1679_2416	Canis lupus	DQ480508	2.98717e-57
						Canis familiaris	DQ480502	2.98717e-57
						Canis aureus	AY289969	2.98717e-57
					000321_1084_3339	Syncerus caffer	U87061	3.99657e-47
					000088_1185_0589	Muntiacus muntjak	AY225986	1.69806e-46
						Muntiacus feae	AF108036	1.69806e-46
						Cephalophus maxwellii	U87016	1.69806e-46
						Oryx gazella	M86500	1.69806e-46
						Cephalophus maxwelli	M86498	1.69806e-46
					007650_1829_0599	Panthera tigris	AY452109	1.17213e-53
						Panthera leo	AF006457	1.17213e-53
						Leopardus wiedii	AF006423	1.17213e-53
					008888_1905_2292	Panthera tigris	DQ151551	2.28249e-33
					000748_1874_3745	Aepyceros melampus	M86496	2.75238e-48
					008872_1914_1605	Equus caballus	AY584828	4.34036e-47
						E hemionus	Z18645	4.34036e-47
					002512_1594_2459	Lynx lynx	AY499291	3.01796e-57
					007607_1927_2474	Ovibos moschatus	AF538357	1.15164e-50
					010655_1820_2565	Mus domesticus	L07096	2.5717e-45
					001745_1312_0474	Syncerus caffer	U87061	3.99657e-47
					002632_1700_1221	Monodon monoceros	AF334502	1.70198e-52
					000665_1905_0272	Neofelis nebulosa	DQ257669	1.89565e-36
					008082_1943_2756	Saiga tatarica	U87053	7.65738e-55
					000104_1342_1714	Pontoporia blainvillei	AF334500	5.00776e-31
						Kogia breviceps	U13111	5.00776e-31
						K breviceps	Z18643	5.00776e-31
					010875_1825_2713	Canis lupus	DQ480508	2.9431e-51
						Canis familiaris	DQ480502	2.9431e-51
						Canis aureus	AY289969	2.9431e-51
					001291_1636_3325	Ovibos moschatus	U87027	1.01615e-50
					004790_1888_3439	Neofelis nebulosa	DQ257669	1.89565e-36
					001949_1686_3542	Equus caballus	X79547	1.48102e-40
						E hemionus	Z18645	1.48102e-40
					004347_1818_0532	Delphinapterus leucas	AF334501	4.19365e-50
					006154_1943_1481	Mus domesticus	L07096	7.01442e-52
					001270_1599_1184	Canis lupus	DQ480508	1.11777e-50
						Canis familiaris	DQ480502	1.11777e-50
						Canis aureus	AY289969	1.11777e-50
					007132_1828_2859	Redunca fulvorufula	AY122050	1.0726e-50
						Cephalophus maxwellii	U87016	1.0726e-50
						Cephalophus maxwelli	M86498	1.0726e-50
					010502_1817_0663	Syncerus caffer	U87061	2.85738e-51
					002777_1607_0898	Rhinopoma hardwickei	AF263231	7.69884e-27
					000343_1138_3036	Ovibos moschatus	U87027	1.17213e-53
					000589_1949_1659	Capricornis sumatraensis	DQ989294	6.687e-49
						Ovibos moschatus	AF538357	6.687e-49
					001096_1616_1910	Ovibos moschatus	AF538357	1.12524e-53
					002032_1951_2044	Ovibos moschatus	U87027	7.71569e-58
					000650_1136_3227	Saiga tatarica	U87053	4.3721e-50
					010674_1822_0923	Ovibos moschatus	U87027	7.88218e-52
					001104_1639_1882	Tetracerus quadricornis	AY256829	1.11777e-50
					002167_1608_0713	Cephalophus maxwellii	U87016	1.11777e-50
						Oryx gazella	M86500	1.11777e-50
						Cephalophus maxwelli	M86498	1.11777e-50
					004172_1937_0845	H sapiens	Z57443	0.000154966
						Homo sapiens	AF058292	0.000154966
					001278_1593_0703	Ovibos moschatus	U87027	7.30367e-52
					000133_1083_1570	Aepyceros melampus	M86496	7.30367e-52
					006404_1853_1060	Saiga tatarica	U87053	3.64878e-38
					000237_1940_0320	Syncerus caffer	U87061	1.02744e-50
					010009_1941_1381	Ovibos moschatus	U87027	1.32636e-56
					003388_1950_1557	Canis lupus	DQ480508	1.77518e-52
						Canis familiaris	DQ480502	1.77518e-52
						Canis aureus	AY289969	1.77518e-52
					008276_1931_3715	Syncerus caffer	U87061	6.01068e-43
					001257_1672_0403	Balaena mysticetus	AP006472	6.03882e-40
					001347_1173_1533	Aepyceros melampus	M86496	6.13401e-21
					009365_1941_2636	Equus caballus	X79547	8.80126e-36
						E hemionus	Z18645	8.80126e-36
					000423_1613_1771	Capricornis sumatraensis	DQ989294	3.80831e-44
						Hippotragus equinus	U87025	3.80831e-44
						Cephalophus maxwellii	U87016	3.80831e-44
						Oryx gazella	M86500	3.80831e-44
						Cephalophus maxwelli	M86498	3.80831e-44
					000588_1613_1957	Ovibos moschatus	U87027	7.71569e-58
					002902_1919_3648	Capricornis sumatraensis	DQ989294	7.01442e-52
					000353_1186_3665	Acinonyx jubatus	AY463959	4.03954e-47
					000068_1921_0380	Canis lupus	DQ480508	1.58659e-43
						Canis familiaris	DQ480502	1.58659e-43
						Canis aureus	AY289969	1.58659e-43
					008517_1852_3172	Syncerus caffer	U87061	2.39457e-48
					000439_1900_3744	Canis latrans	DQ480511	1.83335e-49
						Canis lupus	DQ480508	1.83335e-49
						Canis familiaris	DQ480502	1.83335e-49
						Canis aureus	AY289969	1.83335e-49
					002496_1636_1134	Rhinopoma hardwickei	AF263232	8.7484e-33
						Rhinolophus pumilus	AB061526	8.7484e-33
					006598_1861_1621	Panthera tigris	AY452109	4.58521e-53
						16S rRNA	S75063	4.58521e-53
						Felis catus	U20753	4.58521e-53
						Panthera leo	AF006457	4.58521e-53
						Leopardus wiedii	AF006423	4.58521e-53
						Oncifelis colocolo	AF006411	4.58521e-53
						Felis silvestris	AF006401	4.58521e-53
						Felis libyca	AF006395	4.58521e-53
						Felis chaus	AF006393	4.58521e-53
					004460_1874_2166	Cephalophus maxwellii	U87016	1.56221e-46
						Oryx gazella	M86500	1.56221e-46
						Cephalophus maxwelli	M86498	1.56221e-46
					003342_1941_1665	Ovibos moschatus	U87027	2.13018e-58
					003003_1824_1970	Neofelis nebulosa	DQ257669	1.89565e-36
					007966_1907_2331	Canis lupus	DQ480508	1.86669e-52
						Canis familiaris	DQ480502	1.86669e-52
						Canis aureus	AY289969	1.86669e-52
					000741_1899_3717	Syncerus caffer	U87061	1.56892e-49
					002157_1632_2979	Canis lupus	DQ480508	1.16817e-56
						Canis familiaris	DQ480502	1.16817e-56
						Canis aureus	AY289969	1.16817e-56
					000460_1915_3706	Ovibos moschatus	AF538357	4.77047e-53
					000546_1414_0623	Syncerus caffer	U87061	3.82467e-47
					006889_1822_0568	Aepyceros melampus	M86496	1.9379e-55
					000579_1133_1182	Saiga tatarica	U87053	4.77047e-53
					005490_1819_2180	Mus domesticus	L07096	2.46565e-45
					001446_1571_1577	Kobus ellipsiprymnus	U87015	1.238e-59
					003399_1822_2692	Canis lupus	DQ480508	2.99605e-54
						Canis familiaris	DQ480502	2.99605e-54
						Canis aureus	AY289969	2.99605e-54
					002990_1915_0888	Canis lupus	DQ480508	4.5678e-56
						Canis familiaris	DQ480502	4.5678e-56
						Canis aureus	AY289969	4.5678e-56
					010631_1948_2964	Aepyceros melampus	M86496	1.70995e-49
					011223_1817_1239	Nycticebus pygmaeus	AY773982	2.37804e-15
						Hipposideros cyclops	AY395857	2.37804e-15
						Hipposideros abae	AY395855	2.37804e-15
					003047_1658_0655	Canis lupus	DQ480508	3.11471e-54
						Canis familiaris	DQ480502	3.11471e-54
						Canis aureus	AY289969	3.11471e-54
					004769_1948_0921	Pseudalopex culpaeus	DQ402045	1.03931e-16
						Eubalaena australis	AP006473	1.03931e-16
						Balaena mysticetus	AP006472	1.03931e-16
						Balaenoptera borealis	AP006470	1.03931e-16
					004245_1917_2787	Saiga tatarica	U87053	4.77047e-53
					009946_1817_2528	Mus domesticus	L07096	1.58659e-43
					000415_1332_2281	Balaena mysticetus	AP006472	2.13266e-30
					001878_1646_2547	Tetracerus quadricornis	AY256829	2.99605e-54
						Syncerus caffer	U87061	2.99605e-54
					002773_1931_2986	Ovibos moschatus	U87027	5.09468e-53
					001404_1944_2332	Syncerus caffer	U87061	3.99657e-47
					007659_1887_3453	Ovibos moschatus	U87027	3.32592e-57
					007380_1947_1462	Aepyceros melampus	M86496	5.00054e-56
					003583_1851_1650	Redunca fulvorufula	AY122050	4.39995e-53
						Cephalophus maxwellii	U87016	4.39995e-53
						Cephalophus maxwelli	M86498	4.39995e-53
					000386_1096_3474	Balaena mysticetus	AP006472	6.03882e-40
					008032_1944_1856	Rhinopoma hardwickei	AF263231	1.58997e-18
					001041_1655_2601	Prionailurus planiceps	AF006407	1.70995e-49
					005302_1866_3494	Ovibos moschatus	U87027	1.18034e-56
					007967_1947_3061	Syncerus caffer	U87061	3.99657e-47
					000046_1105_0312	Canis lupus	DQ480508	1.11777e-50
						Canis familiaris	DQ480502	1.11777e-50
						Canis aureus	AY289969	1.11777e-50
					007172_1818_2724	Saiga tatarica	U87053	4.77047e-53
					006677_1942_1324	Ovibos moschatus	U87027	2.13018e-58
					000294_1147_0743	Saiga tatarica	AF400656	4.97171e-20
					001853_1580_1558	Canis lupus	DQ480508	7.35709e-55
						Canis familiaris	DQ480502	7.35709e-55
						Canis aureus	AY289969	7.35709e-55
					001027_1112_3269	Saiga tatarica	U87053	2.81031e-45
					004291_1886_0469	Panthera tigris	AY452109	1.63013e-46
						16S rRNA	S75063	1.63013e-46
						Felis catus	U20753	1.63013e-46
						Panthera leo	AF006457	1.63013e-46
						Leopardus wiedii	AF006423	1.63013e-46
						Felis silvestris	AF006401	1.63013e-46
						Felis libyca	AF006395	1.63013e-46
						Felis chaus	AF006393	1.63013e-46
					001869_1634_0531	Delphinapterus leucas	AF334501	1.61315e-46
					004549_1840_1718	Hippopotamus amphibius	AJ010957	4.19365e-50
					002575_1698_1135	Canis lupus	DQ480508	4.5678e-56
						Canis familiaris	DQ480502	4.5678e-56
						Canis aureus	AY289969	4.5678e-56
					000924_1101_0671	Ovibos moschatus	U87027	4.80821e-56
					001598_1632_0951	Equus caballus	X79547	3.34991e-32
						E hemionus	Z18645	3.34991e-32
					008857_1865_2355	Syncerus caffer	U87061	2.33696e-39
					008485_1940_1459	Equus caballus	X79547	3.80831e-44
						E hemionus	Z18645	3.80831e-44
					000700_1597_2476	Delphinapterus leucas	AF334501	2.99605e-54
					000901_1681_1999	Syncerus caffer	U87061	9.32366e-45
					011209_1883_0754	Equus caballus	X79547	8.77922e-42
						E hemionus	Z18645	8.77922e-42
					001151_1360_2548	Eubalaena australis	AP006473	2.64365e-23
						Balaena mysticetus	AP006472	2.64365e-23
					000269_1061_3138	Equus caballus	X79547	9.32366e-45
						E hemionus	Z18645	9.32366e-45
					003376_1933_2704	Aepyceros melampus	M86496	4.72415e-53
					010965_1822_0926	Ovibos moschatus	U87027	4.51225e-47
					008781_1815_2977	Hippopotamus amphibius	AJ010957	1.05808e-44
					000312_1060_2644	Eubalaena japonica	AP006474	1.03046e-19
						Balaena mysticetus	AP006472	1.03046e-19
					001982_1568_0990	Canis lupus	DQ480508	4.3721e-50
						Canis familiaris	DQ480502	4.3721e-50
						Canis aureus	AY289969	4.3721e-50
					002372_1687_1396	Canis lupus	DQ480508	1.26552e-56
						Canis familiaris	DQ480502	1.26552e-56
						Canis aureus	AY289969	1.26552e-56
					002581_1855_0555	Ovibos moschatus	AF538357	8.33918e-58
					011540_1813_2224	Saiga tatarica	U87053	4.3721e-50
					000247_1924_0373	Acinonyx jubatus	AY463959	2.64228e-48
					002109_1650_1415	Canis lupus	DQ480508	2.8774e-54
						Canis familiaris	DQ480502	2.8774e-54
						Canis aureus	AY289969	2.8774e-54
					001958_1643_1527	Canis lupus	DQ480508	6.86979e-52
						Canis familiaris	DQ480502	6.86979e-52
						Canis aureus	AY289969	6.86979e-52
					009111_1949_0863	Hylobates muelleri	AB050179	1.2251e-31
						Hylobates agilis	AB050174	1.2251e-31
					000702_1424_2265	Rhinopoma hardwickei	AF263232	3.88013e-19
						Rhinolophus pumilus	AB061526	3.88013e-19
					001417_1419_2410	Vulpes vulpes	AM181037	1.04342e-05
						Canis latrans	DQ480511	1.04342e-05
						Canis lupus	DQ480508	1.04342e-05
						Canis familiaris	DQ480502	1.04342e-05
						Cuon alpinus	AY289972	1.04342e-05
						Canis aureus	AY289970	1.04342e-05
						Miniopterus schreibersii	AY395865	1.04342e-05
						Miniopterus pusillus	AY495488	1.04342e-05
						Miniopterus inflatus	AY495487	1.04342e-05
						Chaerephon pumila	AY495454	1.04342e-05
						Nyctimene albiventer	AF293640	1.04342e-05
					000299_1927_0392	Kobus ellipsiprymnus	U87015	4.3721e-50
					005867_1891_3416	Oreotragus oreotragus	EF033134	6.96562e-49
						Tetracerus quadricornis	DQ530063	6.96562e-49
					000803_1943_3177	Tetracerus quadricornis	AY256829	2.57935e-42
					001862_1410_0710	Aepyceros melampus	M86496	2.9431e-51
					007543_1821_1391	Oncifelis colocolo	AF006411	3.14473e-35
					006907_1870_3104	Mus musculus	AY999076	5.02262e-17
						Mus Musculus	DQ106413	5.02262e-17
						Mouse mitochondrion	J01420	5.02262e-17
						Mus domesticus	L07096	5.02262e-17
						Mouse mitochondrial	V00665	5.02262e-17
					002275_1566_3420	Kobus ellipsiprymnus	U87015	2.89478e-57
					007480_1826_3260	Equus caballus	X79547	2.33696e-39
						E hemionus	Z18645	2.33696e-39
					009167_1876_2504	Saiga tatarica	U87053	4.77047e-53
					007679_1889_2634	Neofelis nebulosa	DQ257669	2.95219e-29
					006396_1946_1588	Neophocaena phocaenoides	AF334503	2.97167e-51
						Delphinapterus leucas	AF334501	2.97167e-51
					008134_1900_2029	Tetracerus quadricornis	AY256829	1.56221e-46
					007302_1894_1934	Neophocaena phocaenoides	AF334503	2.49216e-45
						Delphinapterus leucas	AF334501	2.49216e-45
					002187_1904_3367	Loris lydekkerianus	AY773979	7.31333e-14
						Loris tardigradus	AF212953	7.31333e-14
						Aepyceros melampus	U87014	7.31333e-14
					003360_1847_1792	Ovibos moschatus	AF538357	3.01796e-57
					000296_1079_2043	Ovibos moschatus	AF538357	8.33918e-58
					000559_1373_2033	Canis lupus	DQ480508	7.01442e-52
						Canis familiaris	DQ480502	7.01442e-52
						Canis aureus	AY289969	7.01442e-52
					000547_1926_0389	Rhinolophus alcyone	AY395858	1.27503e-28
					001615_1828_2790	Ovibos moschatus	AF538357	1.3517e-59
					008318_1821_2194	Saiga tatarica	U87053	4.77047e-53
					009576_1929_2506	Hippopotamus amphibius	AJ010957	2.33696e-39
					007142_1929_1381	Balaena mysticetus	AP006472	3.25572e-35
					008137_1943_3431	Saiga tatarica	U87053	1.84839e-52
					003200_1594_0615	Syncerus caffer	U87061	8.3594e-39
					003042_1653_0997	Canis lupus	DQ480508	6.86979e-52
						Canis familiaris	DQ480502	6.86979e-52
						Canis aureus	AY289969	6.86979e-52
					000692_1940_0331	Syncerus caffer	U87061	1.53752e-43
					003465_1822_1048	Canis lupus	DQ480508	2.8774e-54
						Canis familiaris	DQ480502	2.8774e-54
						Canis aureus	AY289969	2.8774e-54
					000298_1345_1816	Acinonyx jubatus	AY463959	3.99657e-47
					009729_1882_3069	Ovibos moschatus	AF538357	1.11777e-50
					002920_1920_3140	Kogia breviceps	U13111	1.5912e-24
						K breviceps	Z18643	1.5912e-24
					008118_1906_2853	Hylobates muelleri	AB050179	1.29001e-37
						Hylobates agilis	AB050174	1.29001e-37
					008211_1823_0971	Acinonyx jubatus	AY463959	1.56221e-46
					000338_1155_3082	Syncerus caffer	U87061	4.44626e-53
					003406_1842_3757	H sapiens	Z62860	2.28006e-45
					000842_1321_3191	Hylobates muelleri	AB050179	1.89565e-36
						Hylobates agilis	AB050174	1.89565e-36
					002288_1565_2945	Saiga tatarica	U87053	1.34124e-43
					009944_1822_1249	Acinonyx jubatus	AY463959	4.34036e-47
					001606_1654_0724	Canis lupus	DQ480508	1.80491e-55
						Canis familiaris	DQ480502	1.80491e-55
						Canis aureus	AY289969	1.80491e-55
					000142_1939_0334	Syncerus caffer	U87061	2.72485e-48
					010419_1827_0309	Equus caballus	X79547	1.02231e-47
						E hemionus	Z18645	1.02231e-47
					008983_1905_3650	Equus caballus	AY584828	5.45289e-31
						E hemionus	Z18645	5.45289e-31
					000625_1694_2103	Kogia breviceps	U13111	3.20736e-32
						K breviceps	Z18643	3.20736e-32
					004565_1945_2854	Syncerus caffer	U87061	5.4669e-28
					001400_1322_2435	Canis lupus	DQ480508	1.16817e-56
						Canis familiaris	DQ480502	1.16817e-56
						Canis aureus	AY289969	1.16817e-56
					004849_1926_2465	Equus caballus	X79547	9.7427e-45
						E hemionus	Z18645	9.7427e-45
					002199_1834_2274	Saiga tatarica	U87053	1.68108e-46
					010241_1953_1567	Kobus ellipsiprymnus	U87015	4.261e-53
					000239_1694_2630	Acinonyx jubatus	AY463959	5.55826e-43
					009107_1944_0754	Saiga tatarica	U87053	2.7838e-45
					000049_1428_0366	Kogia simus	AF334490	3.58869e-35
					003044_1949_1786	Hippopotamus amphibius	AJ010957	7.11591e-36
					003790_1912_3065	Okapia johnstoni	AY122044	5.02551e-34
						Tetracerus quadricornis	AY256829	5.02551e-34
					002207_1646_2048	Ovibos moschatus	U87027	2.9431e-51
					000025_1186_0326	Saiga tatarica	U87053	7.24425e-49
					000110_1896_0407	Mus musculus	AY999076	1.44951e-40
						Mus Musculus	DQ106413	1.44951e-40
						Mouse mitochondrion	J01420	1.44951e-40
						Mus domesticus	L07096	1.44951e-40
						Mouse mitochondrial	V00665	1.44951e-40
					008823_1845_1173	Ovibos moschatus	AF538357	1.17457e-47
					000487_1859_3732	Ovibos moschatus	U87027	1.88091e-55
					009256_1899_0573	Aepyceros melampus	M86496	5.93685e-37
					002373_1576_0468	Prionailurus planiceps	AF006407	1.70995e-49
					010725_1925_3326	Syncerus caffer	U87061	9.32366e-45
					001672_1586_3551	Monodon monoceros	AF334502	5.66529e-40
					009225_1822_1764	Hippopotamus amphibius	AJ010957	3.74811e-41
					000293_1153_2005	Canis latrans	DQ480511	1.10648e-50
						Canis lupus	DQ480508	1.10648e-50
						Canis familiaris	DQ480502	1.10648e-50
						Canis aureus	AY289969	1.10648e-50
					005459_1937_3516	Equus caballus	X79547	5.66529e-40
						E hemionus	Z18645	5.66529e-40
					006322_1889_1182	Syncerus caffer	U87061	2.53219e-48
					003757_1634_0381	Canis lupus	DQ480508	9.63794e-45
						Canis familiaris	DQ480502	9.63794e-45
						Canis aureus	AY289969	9.63794e-45
					007677_1846_1956	Kobus ellipsiprymnus	U87015	5.28571e-62
					000992_1365_1369	Hippopotamus amphibius	AJ010813	7.30367e-52
					001217_1396_2286	Saiga tatarica	U87053	4.3721e-50
					003287_1571_1962	Aepyceros melampus	M86496	4.90941e-53
					006120_1821_2745	Panthera pardus	DQ530062	1.13167e-56
					005039_1817_2337	Ovibos moschatus	U87027	4.80821e-56
					002670_1894_3505	Impatiens necrotic	DQ425094	0.937671
						Careproctus melanurus	AY835655	0.937671
						Elassichthys adocetus	AY693483	0.937671
						Cololabis saira	AY655499	0.937671
						Mouse DNA	AL627444	0.937671
						Scomberesox saurus	AF243985	0.937671
						Coryphopterus nicholsi	AY914736	0.937671
						Mus musculus	U16216	0.937671
					011251_1930_1287	Aepyceros melampus	M86496	5.72754e-40
					001019_1572_2577	Naemorhedus goral	AF538358	5.41315e-23
						Ovibos moschatus	AF538357	5.41315e-23
						Cephalophus maxwellii	U87016	5.41315e-23
						Cephalophus maxwelli	M86498	5.41315e-23
					000361_1685_3559	Ovibos moschatus	U87027	1.36433e-59
					001341_1690_3371	Mus domesticus	L07096	1.68368e-52
					003758_1949_1245	Kogia simus	AF334490	6.60984e-24
					007861_1944_0751	Aepyceros melampus	M86496	2.88595e-51
					004598_1948_1651	Canis lupus	DQ480508	9.95222e-45
						Canis familiaris	DQ480502	9.95222e-45
						Canis aureus	AY289969	9.95222e-45
					006172_1878_1832	Canis lupus	DQ480508	7.65738e-55
						Canis familiaris	DQ480502	7.65738e-55
						Canis aureus	AY289969	7.65738e-55
					008365_1940_0623	Felis pardalis	AF006415	8.84541e-39
					001924_1673_0937	Thoopterus nigrescens	AF293646	1.50564e-09
					003673_1941_2678	Canis lupus	DQ480508	1.16293e-50
						Canis familiaris	DQ480502	1.16293e-50
						Canis aureus	AY289969	1.16293e-50
					000140_1877_3717	Acinonyx jubatus	AY463959	4.34036e-47
					003235_1691_2784	Mus domesticus	L07096	1.55387e-43
					007923_1908_0941	Aepyceros melampus	M86496	1.09839e-38
					001744_1891_1804	Arabidopsis thaliana	AC005967	0.0494007
					002280_1609_1162	Kobus ellipsiprymnus	U87015	8.09095e-61
					001690_1567_2790	Pseudalopex culpaeus	DQ402045	1.02763e-16
						Eubalaena australis	AP006473	1.02763e-16
						Balaena mysticetus	AP006472	1.02763e-16
						Balaenoptera borealis	AP006470	1.02763e-16
					009332_1857_0479	Equus caballus	X79547	3.8497e-44
						E hemionus	Z18645	3.8497e-44
					008440_1844_3325	Rhinolophus alcyone	AY395858	1.31572e-28
					001014_1381_2676	Ovibos moschatus	U87027	8.81913e-61
					011008_1819_3104	Canis lupus	DQ480508	2.7838e-45
						Canis familiaris	DQ480502	2.7838e-45
						Canis aureus	AY289969	2.7838e-45
					001917_1898_3362	Pontoporia blainvillei	AF334500	4.72955e-31
						Kogia breviceps	U13111	4.72955e-31
						K breviceps	Z18643	4.72955e-31
					000276_1151_2942	Panthera tigris	AY452109	1.17213e-53
						16S rRNA	S75063	1.17213e-53
						Felis catus	U20753	1.17213e-53
						Panthera leo	AF006457	1.17213e-53
						Leopardus wiedii	AF006423	1.17213e-53
						Oncifelis colocolo	AF006411	1.17213e-53
						Felis silvestris	AF006401	1.17213e-53
						Felis libyca	AF006395	1.17213e-53
						Felis chaus	AF006393	1.17213e-53
					005620_1935_1013	Tetracerus quadricornis	AY256829	1.43375e-40
					000389_1401_2715	Equus caballus	X79547	6.40837e-49
						E hemionus	Z18645	6.40837e-49
					000572_1162_1367	Balaena mysticetus	AP006472	6.03882e-40
					002885_1569_0471	Ovibos moschatus	U87027	1.27769e-56
					004904_1932_2975	Loxodonta africana	DQ316069	2.06811e-61
					001670_1852_1114	Cephalophus maxwellii	U87016	1.11777e-50
						Oryx gazella	M86500	1.11777e-50
						Cephalophus maxwelli	M86498	1.11777e-50
					008528_1873_0570	Canis lupus	DQ480508	4.72901e-50
						Canis familiaris	DQ480502	4.72901e-50
						Canis aureus	AY289969	4.72901e-50
					001522_1945_2983	Saiga tatarica	U87053	4.3721e-50
					002554_1588_2641	Ovibos moschatus	AF538357	4.77047e-53
					001539_1338_1828	Ovibos moschatus	U87027	2.13018e-58
					008754_1857_0626	Canis lupus	DQ480508	4.61588e-56
						Canis familiaris	DQ480502	4.61588e-56
						Canis aureus	AY289969	4.61588e-56
					000530_1893_3694	Canis lupus	DQ480508	2.88595e-51
						Canis familiaris	DQ480502	2.88595e-51
						Canis aureus	AY289969	2.88595e-51
					001653_1924_1783	Sousa chinensis	AY770539	2.59821e-45
						Delphinus delphis	U13106	2.59821e-45
						Stenella coeruleoalba	AJ010816	2.59821e-45
						D delphis	Z18637	2.59821e-45
					000601_1431_0705	Equus caballus	X79547	3.97594e-19
					000085_1063_2658	Syncerus caffer	U87061	3.99657e-47
					003869_1835_3392	Canis lupus	DQ480508	7.01442e-52
						Canis familiaris	DQ480502	7.01442e-52
						Canis aureus	AY289969	7.01442e-52
					003963_1916_3369	Canis lupus	DQ480508	2.98717e-57
						Canis familiaris	DQ480502	2.98717e-57
						Canis aureus	AY289969	2.98717e-57
					000383_1139_2887	Ovibos moschatus	U87027	1.88091e-55
					009247_1816_1999	Syncerus caffer	U87061	7.30367e-52
					000389_1125_1559	Ovibos moschatus	U87027	4.80821e-56
					002826_1941_3419	Canis lupus	DQ480508	1.77518e-52
						Canis familiaris	DQ480502	1.77518e-52
						Canis aureus	AY289969	1.77518e-52
					001624_1823_3506	Saiga tatarica	U87053	1.20729e-53
					000600_1104_3291	Capra falconeri	AF538360	1.6193e-43
					005571_1941_2593	Loxodonta africana	DQ316069	1.89349e-58
					002070_1594_1723	Tetracerus quadricornis	AY256829	1.0726e-50
						Syncerus caffer	U87061	1.0726e-50
					000304_1073_3394	Hippopotamus amphibius	AJ010813	4.34036e-47
					002175_1936_2132	Equus caballus	X79547	5.54078e-40
					003520_1881_3453	Saiga tatarica	U87053	3.9076e-41
					002684_1863_2757	Monodon monoceros	AF334502	7.35709e-55
						Delphinapterus leucas	AF334501	7.35709e-55
					000180_1183_0808	Capricornis sumatraensis	DQ989294	6.687e-49
						Ovibos moschatus	AF538357	6.687e-49
					000548_1394_1135	Redunca fulvorufula	AY122050	6.33383e-43
						Cephalophus maxwellii	U87016	6.33383e-43
						Cephalophus maxwelli	M86498	6.33383e-43
					009752_1950_0787	Hippopotamus amphibius	AJ010957	2.70426e-45
					001992_1915_2433	Ovibos moschatus	AF538357	3.4528e-60
					010004_1920_2890	Syncerus caffer	U87061	2.55971e-48
					002921_1675_0764	Capricornis sumatraensis	DQ989294	7.01442e-52
						Ovibos moschatus	U87027	7.01442e-52
						Capricornis crispus	U87029	7.01442e-52
					008978_1823_1609	Syncerus caffer	U87061	9.32366e-45
					009148_1944_1371	Monodon monoceros	AF334502	9.38468e-42
					005527_1939_2732	Canis lupus	DQ480508	1.1968e-50
						Canis familiaris	DQ480502	1.1968e-50
						Canis aureus	AY289969	1.1968e-50
					010091_1953_1450	Capricornis sumatraensis	DQ989294	6.37417e-46
						Redunca fulvorufula	AY122050	6.37417e-46
						Ovibos moschatus	AF538357	6.37417e-46
						Cephalophus maxwellii	U87016	6.37417e-46
						Cephalophus maxwelli	M86498	6.37417e-46
					008813_1946_0716	Syncerus caffer	U87061	2.27289e-42
					003096_1941_1543	Canis lupus	DQ480508	1.69232e-49
						Canis familiaris	DQ480502	1.69232e-49
						Canis aureus	AY289969	1.69232e-49
					000260_1183_2368	Saiga tatarica	U87053	6.64256e-46
					006620_1830_0511	Saiga tatarica	U87053	1.78411e-23
					003460_1945_2986	Homo sapiens	AF029308	1.06664e-53
						Human DNA	AL356489	1.06664e-53
					002955_1862_2058	Equus caballus	X79547	2.51867e-45
						E hemionus	Z18645	2.51867e-45
					008498_1922_0773	Equus caballus	X79547	8.84541e-39
						E hemionus	Z18645	8.84541e-39
					002332_1602_1129	Canis lupus	DQ480508	1.16817e-56
						Canis familiaris	DQ480502	1.16817e-56
						Canis aureus	AY289969	1.16817e-56
					003316_1850_2676	Aepyceros melampus	M86496	4.80821e-56
					005437_1873_2409	Canis lupus	DQ480508	2.8774e-54
						Canis familiaris	DQ480502	2.8774e-54
						Canis aureus	AY289969	2.8774e-54
					005827_1826_2256	Saiga tatarica	U87053	4.3721e-50
					000133_1634_0378	Canis lupus	DQ480508	7.0568e-55
						Canis familiaris	DQ480502	7.0568e-55
						Canis aureus	AY289969	7.0568e-55
					010836_1926_0993	Syncerus caffer	U87061	2.39457e-48
					002549_1641_3321	Ovibos moschatus	U87027	4.80821e-56
					005396_1937_2839	Aepyceros melampus	M86496	3.11471e-54
					003178_1832_2276	Syncerus caffer	U87061	3.19248e-29
					007075_1882_1972	Macroderma gigas	AY395854	2.56831e-12
						Bos taurus	AB098841	2.56831e-12
						Felis pardalis	AF006415	2.56831e-12
					010284_1815_3512	Syncerus caffer	U87061	2.16588e-23
					005165_1849_2542	Acinonyx jubatus	AY463959	1.17213e-53
					000124_1089_2841	Capricornis sumatraensis	DQ989294	1.01617e-44
						Ovibos moschatus	AF538357	1.01617e-44
					007375_1936_1331	Aepyceros melampus	M86496	3.11471e-54
					001442_1179_3723	Aepyceros melampus	U87014	1.52116e-43
					001959_1642_2313	Monodon monoceros	AF334502	3.99657e-47
					000301_1378_2285	Acinonyx jubatus	AY463959	1.96674e-36
						Lynx canadensis	AY499298	1.96674e-36
						Felis concolor	AF288634	1.96674e-36
						Puma concolor	AF241853	1.96674e-36
					002832_1603_0584	Canis lupus	DQ480508	2.5717e-45
						Canis familiaris	DQ480502	2.5717e-45
						Canis aureus	AY289969	2.5717e-45
					009549_1915_0652	Canis lupus	DQ480508	1.635e-36
						Canis familiaris	DQ480502	1.635e-36
						Canis aureus	AY289969	1.635e-36
					006657_1824_2690	Acinonyx jubatus	AY463959	5.29974e-43
					000285_1384_0372	Syncerus caffer	U87061	6.75666e-49
					010726_1818_3625	Mus domesticus	L07096	4.05668e-44
					009672_1828_1248	Syncerus caffer	U87061	3.99657e-47
					008200_1848_2053	Tetracerus quadricornis	AY256829	1.56221e-46
					000212_1130_3530	Balaena mysticetus	AP006472	8.42673e-36
						Kogia breviceps	U13111	8.42673e-36
						K breviceps	Z18643	8.42673e-36
					001277_1925_3614	Neofelis nebulosa	DQ257669	1.89565e-36
					007283_1901_1665	Tetracerus quadricornis	AY256829	1.11777e-50
					002292_1566_1100	Ovibos moschatus	U87027	7.01442e-52
						Capricornis crispus	U87029	7.01442e-52
					001871_1853_0736	Equus caballus	X79547	8.42673e-36
					008945_1945_1515	Ovibos moschatus	AF538357	3.01796e-57
					000719_1899_0391	Mus domesticus	L07096	1.02231e-47
					003751_1676_0288	Saiga tatarica	U87053	2.14554e-33
					000801_1404_3083	Ovibos moschatus	U87027	2.05128e-58
					000586_1891_3682	Equus asinus	X97337	9.83753e-13
						Equus caballus	X79547	9.83753e-13
						E hemionus	Z18645	9.83753e-13
					001108_1923_3697	Ovibos moschatus	U87027	5.44089e-59
					004501_1940_1140	Rhinolophus monoceros	AF406806	2.61839e-18
						Rhinolophus acuminatus	AY956397	2.61839e-18
						Rhinolophus pumilus	AB061526	2.61839e-18
					011067_1940_3709	Ovibos moschatus	U87027	3.69969e-35
					007497_1897_1272	Ovibos moschatus	AF538357	8.33918e-58
					001873_1826_2068	Canis lupus	DQ480508	1.86669e-52
						Canis familiaris	DQ480502	1.86669e-52
						Canis aureus	AY289969	1.86669e-52
					003467_1591_0508	Aepyceros melampus	M86496	2.83495e-48
					000200_1693_2944	Rhinopoma hardwickei	AF263232	2.7445e-26
					002882_1580_2631	Equus caballus	X79547	3.18173e-35
						E hemionus	Z18645	3.18173e-35
					011488_1828_1206	Equus asinus	X97337	3.83928e-31
						Equus caballus	X79547	3.83928e-31
						E hemionus	Z18645	3.83928e-31
					005496_1868_1791	Saiga tatarica	U87053	3.50143e-29
					000128_1182_2283	Ovibos moschatus	U87027	8.81913e-61
					000760_1435_2356	Tetracerus quadricornis	AY256829	1.56221e-46
					000256_1080_1259	Ovibos moschatus	U87027	4.80821e-56
					004855_1865_1335	Sus scrofa	DQ268530	5.28571e-62
						Sus philippensis	AY920912	5.28571e-62
					007990_1945_2831	Balaena mysticetus	AP006472	1.41142e-37
						Kogia breviceps	U13111	1.41142e-37
						K breviceps	Z18643	1.41142e-37
					000356_1923_0303	Aepyceros melampus	M86496	1.10648e-50
					005279_1881_2636	Cephalophus maxwellii	U87016	1.11777e-50
						Oryx gazella	M86500	1.11777e-50
						Cephalophus maxwelli	M86498	1.11777e-50
					002854_1642_1799	Capricornis sumatraensis	DQ989294	7.01442e-52
						Ovibos moschatus	U87027	7.01442e-52
						Capricornis crispus	U87029	7.01442e-52
					000122_1349_3707	Syncerus caffer	U87061	7.30367e-52
					001240_1856_0280	Monodon monoceros	AF334502	4.19365e-50
						Delphinapterus leucas	AF334501	4.19365e-50
					001916_1642_3428	Syncerus caffer	U87061	1.63944e-49
					000320_1065_1336	Saiga tatarica	U87053	4.81678e-53
					000107_1908_0286	Acinonyx jubatus	AY463959	6.29856e-25
					002505_1451_1765	Pontoporia blainvillei	AF334500	1.28646e-34
					005181_1880_3154	Ovibos moschatus	U87027	7.01442e-52
						Capricornis crispus	U87029	7.01442e-52
					000121_1596_3751	Ovibos moschatus	U87027	1.41638e-62
					000453_1623_2878	Monodon monoceros	AF334502	2.74308e-51
					009889_1911_2380	Ovibos moschatus	U87027	5.09468e-53
					011292_1883_2183	Ovibos moschatus	AF538357	3.01796e-57
					007182_1889_2799	Kobus ellipsiprymnus	U87015	1.80491e-55
					000382_1935_0304	Equus asinus	X97337	1.6519e-27
						Equus caballus	X79547	1.6519e-27
						E hemionus	Z18645	1.6519e-27
					009078_1845_3187	Lynx pardinus	DQ655653	1.0726e-50
						Acinonyx jubatus	AY463959	1.0726e-50
						Herpailurus yaguarondi	AF241812	1.0726e-50
						Catopuma temminckii	AF006447	1.0726e-50
						Prionailurus planiceps	AF006407	1.0726e-50
					002357_1598_0970	Ovibos moschatus	U87027	4.80821e-56
					006256_1940_3225	Tetracerus quadricornis	DQ530063	4.95624e-25
						Syncerus caffer	U87061	4.95624e-25
					008009_1856_2699	Ovibos moschatus	U87027	2.05128e-58
					000056_1066_0868	Ovibos moschatus	U87027	7.71569e-58
					000192_1652_2952	Ovibos moschatus	U87027	5.00054e-56
					000957_1376_1055	Canis lupus	DQ480508	3.11471e-54
						Canis familiaris	DQ480502	3.11471e-54
						Canis aureus	AY289969	3.11471e-54
					001916_1343_2337	Hylobates muelleri	AB050179	1.29001e-37
						Hylobates agilis	AB050174	1.29001e-37
					009342_1814_1794	Kobus ellipsiprymnus	U87015	8.09095e-61
					003635_1858_1461	Canis lupus	DQ480508	1.18034e-56
						Canis familiaris	DQ480502	1.18034e-56
						Canis aureus	AY289969	1.18034e-56
					001662_1668_3162	Canis lupus	DQ480508	2.98717e-57
						Canis familiaris	DQ480502	2.98717e-57
						Canis aureus	AY289969	2.98717e-57
					000287_1168_0990	Ovibos moschatus	U87027	1.10932e-47
					002588_1597_1822	Canis lupus	DQ480508	2.8774e-54
						Canis familiaris	DQ480502	2.8774e-54
						Canis aureus	AY289969	2.8774e-54
					009807_1951_0736	Syncerus caffer	U87061	1.47209e-43
					000477_1881_0320	Aepyceros melampus	M86496	3.50143e-29
					002755_1654_1155	Okapia johnstoni	AY122044	1.34493e-34
						Tetracerus quadricornis	AY256829	1.34493e-34
					001883_1826_2335	Kobus ellipsiprymnus	U87015	1.89349e-58
					002738_1906_1218	Camelus bactrianus	AJ010814	6.85167e-24
					000009_1100_3732	Cephalophus maxwellii	U87016	1.11777e-50
						Oryx gazella	M86500	1.11777e-50
						Cephalophus maxwelli	M86498	1.11777e-50
					006583_1908_1160	Ovibos moschatus	AF538357	7.24425e-49
					001253_1841_0304	Pseudalopex culpaeus	DQ402045	1.02763e-16
						Eubalaena australis	AP006473	1.02763e-16
						Balaena mysticetus	AP006472	1.02763e-16
						Balaenoptera borealis	AP006470	1.02763e-16
					005812_1932_0950	Syncerus caffer	U87061	3.99657e-47
					003346_1630_1315	Canis lupus	DQ480508	1.03319e-47
						Canis familiaris	DQ480502	1.03319e-47
						Canis aureus	AY289969	1.03319e-47
					001343_1426_1660	Syncerus caffer	U87061	7.30367e-52
					002300_1823_1557	Scophthalmus aquosus	DQ532957	0.877176
						Engystomops pustulosus	DQ337249	0.877176
						Engystomops petersi	DQ337234	0.877176
						Engystomops cf	DQ337229	0.877176
						Engystomops randi	DQ337228	0.877176
						Engystomops montubio	DQ337224	0.877176
						Engystomops coloradorum	DQ337222	0.877176
						Engystomops guayaco	DQ337220	0.877176
						Engystomops sp	DQ337218	0.877176
						Engystomops pustulatus	DQ337215	0.877176
						Arabidopsis thaliana	AC005967	0.877176
						Human DNA	AL365272	0.877176
						Physalaemus pustulatus	AY834184	0.877176
						Physalaemus coloradorum	AY834182	0.877176
						Physalaemus randi	AY834180	0.877176
						Physalaemus montubio	AY834178	0.877176
						Physalaemus guayaco	AY834176	0.877176
						Noturus funebris	AF118699	0.877176
					009517_1942_1677	Sus scrofa	DQ268530	2.73077e-45
						Sus philippensis	AY920912	2.73077e-45
					007214_1829_0590	Hippopotamus amphibius	AJ010957	1.63013e-46
					006544_1899_3201	Ovibos moschatus	U87027	1.41638e-62
					006928_1836_3014	Equus caballus	X79547	5.81678e-43
						E hemionus	Z18645	5.81678e-43
					002231_1673_0751	Canis lupus	DQ480508	4.26365e-44
						Canis familiaris	DQ480502	4.26365e-44
						Canis aureus	AY289969	4.26365e-44
					010317_1852_2461	Aepyceros melampus	M86496	4.72415e-53
					001685_1315_1545	Panthera tigris	AY452109	4.58521e-53
						16S rRNA	S75063	4.58521e-53
						Felis catus	U20753	4.58521e-53
						Panthera leo	AF006457	4.58521e-53
						Leopardus wiedii	AF006423	4.58521e-53
						Oncifelis colocolo	AF006411	4.58521e-53
						Felis silvestris	AF006401	4.58521e-53
						Felis libyca	AF006395	4.58521e-53
						Felis chaus	AF006393	4.58521e-53
					008664_1851_2725	Saiga tatarica	U87053	1.86669e-52
					010641_1817_1923	Syncerus caffer	U87061	4.10753e-15
					004145_1945_0958	Canis lupus	DQ480508	7.35709e-55
						Canis familiaris	DQ480502	7.35709e-55
						Canis aureus	AY289969	7.35709e-55
					000624_1420_1917	Aepyceros melampus	M86496	3.11471e-54
					009613_1912_2347	Ovibos moschatus	U87027	3.23336e-54
					001725_1581_2558	Saiga tatarica	AF400656	2.13261e-36
					005574_1829_2822	Prionailurus bengalensis	AF006437	3.16507e-60
					010002_1952_1613	Canis lupus	DQ480508	2.19119e-33
						Canis familiaris	DQ480502	2.19119e-33
						Canis aureus	AY289969	2.19119e-33
					005650_1854_1863	Gerbilliscus kempi	AM409228	0.187546
						Gerbilliscus guineae	AM409225	0.187546
						Gerbilliscus robustus	AM409222	0.187546
						Gazella granti	EF033136	0.187546
						Gazella bennettii	DQ989297	0.187546
						Rattus norvegicus	DQ673917	0.187546
						Ovis aries	DQ867013	0.187546
						Bos indicus	DQ867010	0.187546
						Bubalus bubalis	DQ867009	0.187546
						Tetracerus quadricornis	DQ530063	0.187546
						Chain R	2FTC-R	0.187546
						Microtus rossiaemeridionalis	DQ015676	0.187546
						Moschus fuscus	DQ449627	0.187546
						Mus musculus	AY999076	0.187546
						Peromyscus attwateri	DQ179711	0.187546
						Gazella thomsonii	DQ283322	0.187546
						Equus caballus	AY584828	0.187546
						Bos grunniens	AY684273	0.187546
						Bos taurus	AY676873	0.187546
						Redunca fulvorufula	AY122050	0.187546
						Hippotragus niger	AY122049	0.187546
						Giraffa camelopardalis	AY122046	0.187546
						Okapia johnstoni	AY122044	0.187546
						Hylomys suillus	AY121770	0.187546
						Phrynops nasuta	AF113637	0.187546
						Phrynops gibbus	AF113636	0.187546
						Otomys irroratus	AF141253	0.187546
						Millardia meltada	AF141252	0.187546
						Hybomys univittatus	AF141250	0.187546
						Dasymys incomtus	AF141248	0.187546
						Dasymys rufulus	AF141247	0.187546
						Aethomys namaquensis	AF141246	0.187546
						Aethomys chrysophilus	AF141245	0.187546
						Rhabdomys pumilio	AF141244	0.187546
						Pelomys fallax	AF141243	0.187546
						Pelomys campanae	AF141242	0.187546
						Mylomys dybowskii	AF141241	0.187546
						Lemniscomys striatus	AF141240	0.187546
						Lemniscomys rosalia	AF141238	0.187546
						Lemniscomys macculus	AF141237	0.187546
						Lemniscomys bellieri	AF141236	0.187546
						Lemniscomys zebra	AF141235	0.187546
						Golunda ellioti	AF141234	0.187546
						Desmomys harringtoni	AF141233	0.187546
						Arvicanthis sp	AF141232	0.187546
						Arvicanthis neumanni	AF141229	0.187546
						Arvicanthis niloticus	AF141228	0.187546
						Arvicanthis abyssinicus	AF141227	0.187546
						Lama pacos	Y19184	0.187546
					002250_1570_2201	Acinonyx jubatus	AY463959	2.85738e-51
					006056_1927_3338	Ovibos moschatus	U87027	7.71569e-58
					000731_1669_2987	Tetracerus quadricornis	AY256829	1.56221e-46
					004434_1894_0591	Saiga tatarica	U87053	4.3721e-50
					003358_1944_1170	Prionailurus rubiginosa	AF006445	5.00776e-31
					001726_1665_1932	Prionailurus planiceps	AF006407	1.70995e-49
					008263_1849_1696	Aepyceros melampus	M86496	1.0057e-44
					010230_1943_2928	Ovibos moschatus	AF538357	2.85738e-51
					003598_1579_3044	Equus asinus	X97337	2.24735e-42
						Equus caballus	X79547	2.24735e-42
						E hemionus	Z18645	2.24735e-42
					001111_1365_2459	Mus domesticus	L07096	4.3721e-50
					003940_1930_1490	Naemorhedus goral	AF538358	5.41315e-23
						Ovibos moschatus	AF538357	5.41315e-23
						Cephalophus maxwellii	U87016	5.41315e-23
						Cephalophus maxwelli	M86498	5.41315e-23
					001533_1573_2277	Oncifelis geoffroyi	AF241818	2.81063e-26
						Prionailurus rubiginosa	AF006445	2.81063e-26
						Prionailurus bengalensis	AF006437	2.81063e-26
						Leopardus tigrinus	AF006421	2.81063e-26
						Prionailurus planiceps	AF006407	2.81063e-26
					008594_1935_2722	Ovibos moschatus	AF538357	3.01796e-57
					001351_1599_0840	Canis lupus	DQ480508	2.8774e-54
						Canis familiaris	DQ480502	2.8774e-54
						Canis aureus	AY289969	2.8774e-54
					009583_1846_2354	Syncerus caffer	U87061	3.99657e-47
					002375_1686_3286	Canis lupus	DQ480508	2.58724e-48
						Canis familiaris	DQ480502	2.58724e-48
						Canis aureus	AY289969	2.58724e-48
					009178_1932_2576	Syncerus caffer	U87061	1.418e-40
					002546_1683_2792	Mus domesticus	L07096	2.43914e-45
					005022_1910_2630	Equus caballus	X79547	9.7427e-45
						E hemionus	Z18645	9.7427e-45
					000346_1911_0434	Hippopotamus amphibius	AJ010957	1.53752e-43
					010245_1821_1426	Tetracerus quadricornis	DQ530063	9.53318e-45
						Syncerus caffer	U87061	9.53318e-45
					008015_1850_1771	Canis lupus	DQ480508	4.55055e-50
						Canis familiaris	DQ480502	4.55055e-50
						Canis aureus	AY289969	4.55055e-50
					007210_1820_0623	Syncerus caffer	U87061	3.99657e-47
					001707_1937_0665	Ovibos moschatus	U87027	7.71569e-58
					004891_1831_3006	Thoopterus nigrescens	AF293646	1.59022e-09
					000905_1851_0289	Syncerus caffer	U87061	8.29745e-33
					006580_1821_2390	Aepyceros melampus	U87014	1.12524e-53
					000043_1082_2078	Canis lupus	DQ480508	7.35709e-55
						Canis familiaris	DQ480502	7.35709e-55
						Canis aureus	AY289969	7.35709e-55
					000442_1864_0345	Kogia simus	AF334490	3.58869e-35
					000170_1184_2958	Saiga tatarica	U87053	6.64256e-46
					001172_1856_3470	Ovibos moschatus	U87027	5.00054e-56
					003413_1951_0976	Gazella granti	EF033136	1.15198e-11
						Gazella bennettii	DQ989297	1.15198e-11
						Antilope cervicapra	DQ989295	1.15198e-11
						Gazella thomsonii	DQ283322	1.15198e-11
						Rhinolophus ferrumequinum	AY395859	1.15198e-11
						Gazella subgutturosa	AF538359	1.15198e-11
						Ourebia ourebi	U87054	1.15198e-11
						Gazella thomsoni	U87018	1.15198e-11
						Antidorcas marsupialis	U87055	1.15198e-11
						Procapra gutturosa	AF401514	1.15198e-11
					007309_1936_0945	Rhinopoma hardwickei	AF263232	3.88013e-19
						Rhinolophus pumilus	AB061526	3.88013e-19
					000825_1428_1906	Canis lupus	DQ480508	7.35709e-55
						Canis familiaris	DQ480502	7.35709e-55
						Canis aureus	AY289969	7.35709e-55
					000069_1447_2569	Syncerus caffer	U87061	6.40837e-49
					006185_1825_0396	Equus asinus	X97337	6.64256e-46
						Equus caballus	X79547	6.64256e-46
						E hemionus	Z18645	6.64256e-46
					007378_1943_2245	Equus caballus	X79547	2.33309e-45
						E hemionus	Z18645	2.33309e-45
					001379_1319_2178	Ovibos moschatus	U87027	2.78774e-28
					000349_1657_0342	Canis lupus	DQ480508	7.35709e-55
						Canis familiaris	DQ480502	7.35709e-55
						Canis aureus	AY289969	7.35709e-55
					007897_1815_3261	Syncerus caffer	U87061	1.61315e-46
					000884_1841_3239	Canis lupus	DQ480508	1.80491e-55
						Canis familiaris	DQ480502	1.80491e-55
						Canis aureus	AY289969	1.80491e-55
					009168_1922_0995	Canis lupus	DQ480508	1.16817e-56
						Canis familiaris	DQ480502	1.16817e-56
						Canis aureus	AY289969	1.16817e-56
					011135_1813_1961	Naemorhedus goral	AF538358	1.64339e-33
						Ovibos moschatus	AF538357	1.64339e-33
					000069_1066_1626	Ovibos moschatus	U87027	4.80821e-56
					001658_1646_2950	Canis lupus	DQ480508	2.98717e-57
						Canis familiaris	DQ480502	2.98717e-57
						Canis aureus	AY289969	2.98717e-57
					004401_1868_0688	Equus caballus	X79547	6.07531e-43
						E hemionus	Z18645	6.07531e-43
					003210_1828_1747	Ovibos moschatus	U87027	4.80821e-56
					003464_1865_1979	Kobus ellipsiprymnus	U87015	2.89478e-57
					010381_1892_3539	Equus caballus	X79547	6.89597e-49
						E hemionus	Z18645	6.89597e-49
					001091_1368_0471	Ovibos moschatus	U87027	7.30367e-52
					008255_1876_2439	Syncerus caffer	U87061	1.02231e-47
					001159_1887_0434	Redunca fulvorufula	AY122050	1.0726e-50
						Cephalophus maxwellii	U87016	1.0726e-50
						Cephalophus maxwelli	M86498	1.0726e-50
					007955_1822_2231	Canis lupus	DQ480508	2.68594e-51
						Canis familiaris	DQ480502	2.68594e-51
						Canis aureus	AY289969	2.68594e-51
					007752_1841_2512	Canis latrans	DQ480511	2.3296e-27
						Canis lupus	DQ480508	2.3296e-27
						Canis familiaris	DQ480502	2.3296e-27
						Canis aureus	AY289969	2.3296e-27
					000071_1650_3749	Saiga tatarica	U87053	1.77518e-52
					000696_1923_3674	Canis lupus	DQ480508	2.42612e-42
						Canis familiaris	DQ480502	2.42612e-42
						Canis aureus	AY289969	2.42612e-42
					002801_1639_1213	Canis lupus	DQ480508	2.98717e-57
						Canis familiaris	DQ480502	2.98717e-57
						Canis aureus	AY289969	2.98717e-57
					000124_1440_2911	Mus musculus	AC129553	1.88427e-10
					005621_1936_1159	Canis lupus	DQ480508	4.5678e-56
						Canis familiaris	DQ480502	4.5678e-56
						Canis aureus	AY289969	4.5678e-56
					001649_1433_1297	Camelus bactrianus	AJ010814	8.24371e-20
					000312_1620_3723	Capricornis sumatraensis	DQ989294	9.01897e-33
						Ovibos moschatus	AF538357	9.01897e-33
					001456_1841_2191	Ovibos moschatus	AF538357	1.60706e-40
					002192_1417_2321	Ovibos moschatus	AF538357	7.66219e-49
					000967_1934_2756	Ovibos moschatus	AF538357	5.54482e-62
					004545_1846_0279	Saiga tatarica	U87053	1.61315e-46
					008243_1875_1020	Redunca fulvorufula	AY122050	2.61476e-48
						Cephalophus maxwellii	U87016	2.61476e-48
						Cephalophus maxwelli	M86498	2.61476e-48
					001844_1580_0904	Thoopterus nigrescens	AF293646	1.4718e-09
					003515_1566_2638	Hylobates muelleri	AB050179	2.1452e-42
						Hylobates agilis	AB050174	2.1452e-42
					005407_1852_0733	Syncerus caffer	U87061	3.99657e-47
					003683_1945_1925	Ovibos moschatus	U87027	2.05128e-58
					001849_1613_0515	Equus caballus	X79547	3.14473e-35
					002759_1591_1489	Panthera tigris	AY452109	4.58521e-53
						Panthera leo	AF006457	4.58521e-53
						Leopardus wiedii	AF006423	4.58521e-53
					007572_1918_1056	Kogia simus	AF334490	1.16652e-28
					009096_1896_1276	Syncerus caffer	U87061	6.07531e-43
					007759_1822_0914	Ovibos moschatus	U87027	7.30367e-52
					005816_1861_2689	Neophocaena phocaenoides	AF334503	5.00054e-56
						Delphinapterus leucas	AF334501	5.00054e-56
					000516_1911_0514	Capricornis sumatraensis	DQ989294	3.78798e-41
						Hippotragus equinus	U87025	3.78798e-41
						Cephalophus maxwellii	U87016	3.78798e-41
						Oryx gazella	M86500	3.78798e-41
						Cephalophus maxwelli	M86498	3.78798e-41
					009429_1934_1748	Sus scrofa	DQ268530	8.02744e-58
						Sus philippensis	AY920912	8.02744e-58
					004530_1942_0511	Tetracerus quadricornis	AY256829	5.4571e-37
					000299_1430_0440	Monodon monoceros	AF334502	5.00054e-56
					006019_1860_1868	Syncerus caffer	U87061	4.08251e-47
					011693_1857_3625	Canis lupus	DQ480508	6.1262e-24
						Canis familiaris	DQ480502	6.1262e-24
						Canis aureus	AY289969	6.1262e-24
					001089_1680_2960	Rhinopoma hardwickei	AF263231	1.68461e-18
					007549_1939_3603	Mus domesticus	L07096	1.10648e-50
					001184_1358_2570	Ovibos moschatus	U87027	3.42083e-60
					002716_1597_1424	Canis lupus	DQ480508	1.75688e-52
						Canis familiaris	DQ480502	1.75688e-52
						Canis aureus	AY289969	1.75688e-52
					011696_1910_0319	Saiga tatarica	U87053	1.86669e-52
					002599_1857_1029	Aepyceros melampus	M86496	2.5717e-45
					000926_1941_3019	Canis lupus	DQ480508	7.35709e-55
						Canis familiaris	DQ480502	7.35709e-55
						Canis aureus	AY289969	7.35709e-55
					000425_1594_3761	Ovibos moschatus	U87027	7.30367e-52
					000103_1119_1481	Aepyceros melampus	M86496	1.86669e-52
					003086_1608_1275	Panthera tigris	AY452109	1.17213e-53
						Panthera leo	AF006457	1.17213e-53
						Leopardus wiedii	AF006423	1.17213e-53
					001124_1608_3154	Ovibos moschatus	U87027	5.00054e-56
					007527_1823_2442	Aepyceros melampus	M86496	2.9431e-51
					011165_1936_1074	Syncerus caffer	U87061	8.05221e-36
					008603_1907_0754	Saiga tatarica	U87053	1.93989e-52
					000383_1339_1567	Monodon monoceros	AF334502	5.00054e-56
					011338_1813_3083	Acinonyx jubatus	AY463959	3.81068e-35
					001089_1910_3663	Canis lupus	DQ480508	7.01442e-52
						Canis familiaris	DQ480502	7.01442e-52
						Canis aureus	AY289969	7.01442e-52
					011212_1815_2309	Aepyceros melampus	U87014	2.46565e-45
					008120_1868_1769	Syncerus caffer	U87061	3.99657e-47
					006884_1940_1258	Canis lupus	DQ480508	7.35709e-55
						Canis familiaris	DQ480502	7.35709e-55
						Canis aureus	AY289969	7.35709e-55
					009084_1842_1991	Saiga tatarica	U87053	1.01617e-44
					006180_1899_0702	Loxodonta africana	DQ316069	2.06811e-61
					011035_1933_1814	Ovibos moschatus	AF538357	3.32592e-57
					008852_1906_2149	Pteronotus parnellii	AF263221	1.90608e-21
						Eubalaena australis	AP006473	1.90608e-21
						Balaena mysticetus	AP006472	1.90608e-21
						Lipotes vexillifer	AF304065	1.90608e-21
					006089_1907_1365	Rhinolophus alcyone	AY395858	4.38834e-25
						Rhinolophus pumilus	AB061526	4.38834e-25
					007279_1951_1088	Okapia johnstoni	AY122044	3.27863e-32
						Tetracerus quadricornis	AY256829	3.27863e-32
					005171_1933_3508	Aepyceros melampus	M86496	1.0057e-44
					002758_1653_1017	Acinonyx jubatus	AY463959	2.85738e-51
					009197_1935_2248	Canis lupus	DQ480508	2.46435e-36
						Canis familiaris	DQ480502	2.46435e-36
						Canis aureus	AY289969	2.46435e-36
					000642_1896_3695	Ovibos moschatus	AF538357	5.19287e-56
					000143_1103_1609	Ovibos moschatus	U87027	1.33853e-56
					003750_1881_1318	Ovibos moschatus	AF538357	5.54482e-62
					000110_1443_2866	Sousa chinensis	AY770539	7.30367e-52
						Delphinus delphis	U13106	7.30367e-52
						Stenella coeruleoalba	AJ010816	7.30367e-52
						D delphis	Z18637	7.30367e-52
					006533_1911_0910	Gazella granti	EF033136	1.67015e-10
						Oreotragus oreotragus	EF033134	1.67015e-10
						Gazella bennettii	DQ989297	1.67015e-10
						Antilope cervicapra	DQ989295	1.67015e-10
						Capricornis sumatraensis	DQ989294	1.67015e-10
						Cervus eldi	DQ989293	1.67015e-10
						Moschus fuscus	DQ449627	1.67015e-10
						Gazella thomsonii	DQ283322	1.67015e-10
						Nycticebus pygmaeus	AY773982	1.67015e-10
						Loris lydekkerianus	AY773979	1.67015e-10
						Bos grunniens	AY684273	1.67015e-10
						Rhinolophus ferrumequinum	AY395859	1.67015e-10
						Moschus moschiferus	AY122045	1.67015e-10
						Okapia johnstoni	AY122044	1.67015e-10
						Gazella subgutturosa	AF538359	1.67015e-10
						Rhinolophus monoceros	AF406806	1.67015e-10
						Trichosurus vulpecula	AF187888	1.67015e-10
						Tragelaphus scriptus	AY667204	1.67015e-10
						Eidolon helvum	AF293648	1.67015e-10
						Rhinolophus acuminatus	AY956397	1.67015e-10
						Melonycteris melanops	AF044614	1.67015e-10
						Loris tardigradus	AF212953	1.67015e-10
						Tragelaphus angasi	U87059	1.67015e-10
						Redunca arundinum	U87046	1.67015e-10
						Ourebia ourebi	U87054	1.67015e-10
						Kobus vardoni	U87051	1.67015e-10
						Kobus megaceros	U87048	1.67015e-10
						Kobus kob	U87050	1.67015e-10
						Kobus ellipsiprymnus	U87015	1.67015e-10
						Gazella thomsoni	U87018	1.67015e-10
						Capricornis crispus	U87029	1.67015e-10
						Antidorcas marsupialis	U87055	1.67015e-10
						Aepyceros melampus	U87014	1.67015e-10
						Procapra gutturosa	AF401514	1.67015e-10
						Rhinolophus pumilus	AB061526	1.67015e-10
					002204_1594_2008	Prionailurus bengalensis	AF006437	3.01796e-57
					004642_1868_0458	Molossops abrasus	AY395862	4.32179e-17
					005137_1916_2541	Ovibos moschatus	U87027	4.80821e-56
					002258_1625_1474	Sus scrofa	DQ268530	8.80126e-36
						Sus philippensis	AY920912	8.80126e-36
					001564_1686_1993	Capra falconeri	AF538360	5.00054e-56
					005858_1927_0879	Mus domesticus	L07096	2.62879e-51
					002105_1624_1213	Canis lupus	DQ480508	1.75688e-52
						Canis familiaris	DQ480502	1.75688e-52
						Canis aureus	AY289969	1.75688e-52
					008897_1942_1699	Syncerus caffer	U87061	3.99657e-47
					004496_1827_1634	Canis familiaris	AB048587	2.84773e-54
					000884_1622_0443	Chain R	2FTC-R	1.11777e-50
						Bos grunniens	AY684273	1.11777e-50
						Bos taurus	AY676873	1.11777e-50
						Muntiacus muntjak	AY225986	1.11777e-50
						Bos indicus	AF492350	1.11777e-50
						Elaphodus cephalophus	AF108040	1.11777e-50
						Cephalophus maxwellii	U87016	1.11777e-50
						Oryx gazella	M86500	1.11777e-50
						Cephalophus maxwelli	M86498	1.11777e-50
					011090_1825_1378	Ovibos moschatus	U87027	1.12906e-50
					001251_1587_1900	Pteronotus parnellii	AF263221	2.6598e-17
						Eubalaena australis	AP006473	2.6598e-17
						Balaena mysticetus	AP006472	2.6598e-17
						Lipotes vexillifer	AF304065	2.6598e-17
					009301_1836_2393	Mus musculus	AY999076	2.21539e-16
						Mus Musculus	DQ106413	2.21539e-16
						Mouse mitochondrion	J01420	2.21539e-16
						Mus domesticus	L07096	2.21539e-16
						Mouse mitochondrial	V00665	2.21539e-16
					000178_1923_3680	Canis lupus	DQ480508	4.80821e-56
						Canis familiaris	DQ480502	4.80821e-56
						Canis aureus	AY289969	4.80821e-56
					004889_1866_0579	Equus caballus	X79547	2.38611e-45
					001022_1413_0647	Ovibos moschatus	U87027	2.78774e-28
					007201_1898_0761	Ovibos moschatus	AF538357	1.3517e-59
					009264_1908_1290	Canis lupus	DQ480508	2.98717e-57
						Canis familiaris	DQ480502	2.98717e-57
						Canis aureus	AY289969	2.98717e-57
					004019_1840_0516	Syncerus caffer	U87061	6.40837e-49
					000392_1069_2715	Hippopotamus amphibius	AJ010813	4.34036e-47
					000799_1851_3756	Syncerus caffer	U87061	2.39457e-48
					003894_1828_0615	Mus domesticus	L07096	1.08757e-47
						Mus musculus	AY675564	1.08757e-47
					000557_1922_0300	Canis lupus	DQ480508	7.35709e-55
						Canis familiaris	DQ480502	7.35709e-55
						Canis aureus	AY289969	7.35709e-55
					000331_1336_2825	Aepyceros melampus	M86496	1.70995e-49
					001859_1693_1375	Acinonyx jubatus	AY463959	2.33309e-45
					001325_1872_2491	Ovibos moschatus	AF538357	5.54482e-62
					000530_1190_0374	Canis latrans	DQ480511	4.29738e-47
						Canis lupus	DQ480508	4.29738e-47
						Canis familiaris	DQ480502	4.29738e-47
						Canis aureus	AY289969	4.29738e-47
					001213_1376_1043	Canis lupus	DQ480508	2.8774e-54
						Canis familiaris	DQ480502	2.8774e-54
						Canis aureus	AY289969	2.8774e-54
					009141_1942_2599	Aepyceros melampus	U87014	7.17459e-49
					006646_1899_2697	Ovibos moschatus	AF538357	2.74308e-51
					007181_1829_1187	Syncerus caffer	U87061	3.58869e-35
					000047_1129_0409	Cephalophus maxwellii	U87016	1.69806e-46
						Oryx gazella	M86500	1.69806e-46
						Cephalophus maxwelli	M86498	1.69806e-46
					005097_1888_0305	Ovibos moschatus	U87027	1.32636e-56
					003456_1823_3199	Saiga tatarica	U87053	4.77047e-53
					001799_1363_1990	Equus caballus	X79547	3.45674e-38
					002474_1910_2394	Aepyceros melampus	M86496	1.63013e-46
					000398_1063_1026	Canis lupus	DQ480508	3.11471e-54
						Canis familiaris	DQ480502	3.11471e-54
						Canis aureus	AY289969	3.11471e-54
					000200_1179_3571	Saiga tatarica	U87053	2.83495e-48
					009206_1906_0670	Equus caballus	X79547	1.69474e-06
					000196_1453_1767	Pontoporia blainvillei	AF334500	1.28646e-34
					008712_1903_0522	Ovibos moschatus	U87027	4.80821e-56
					000090_1345_1374	Ovibos moschatus	AF538357	1.12524e-53
						Capricornis crispus	U87029	1.12524e-53
					007579_1867_2203	Aepyceros melampus	M86496	9.48559e-42
					001881_1937_2951	Sousa chinensis	AY770539	2.49216e-45
						Delphinus delphis	U13106	2.49216e-45
						Stenella coeruleoalba	AJ010816	2.49216e-45
						D delphis	Z18637	2.49216e-45
					008387_1820_2821	Canis lupus	DQ480508	1.04406e-47
						Canis familiaris	DQ480502	1.04406e-47
						Canis aureus	AY289969	1.04406e-47
					000447_1571_0660	Canis lupus	DQ480508	1.80491e-55
						Canis familiaris	DQ480502	1.80491e-55
						Canis aureus	AY289969	1.80491e-55
					001410_1850_1516	Canis lupus	DQ480508	3.11471e-54
						Canis familiaris	DQ480502	3.11471e-54
						Canis aureus	AY289969	3.11471e-54
					007778_1943_1189	Oncifelis geoffroyi	AF241818	6.69045e-24
						Prionailurus rubiginosa	AF006445	6.69045e-24
						Prionailurus bengalensis	AF006437	6.69045e-24
						Leopardus tigrinus	AF006421	6.69045e-24
						Prionailurus planiceps	AF006407	6.69045e-24
					009492_1842_0592	Ovibos moschatus	U87027	1.10932e-47
					002807_1640_1100	Kobus ellipsiprymnus	U87015	2.89478e-57
					001660_1390_2938	Pontoporia blainvillei	AF334500	1.78046e-49
						Balaena mysticetus	AP006472	1.78046e-49
					010562_1813_1893	Equus caballus	AY584828	5.00776e-31
						E hemionus	Z18645	5.00776e-31
					001506_1644_1733	Prionailurus viverrinus	AF006451	2.99353e-32
					011103_1821_3582	Muntiacus feae	AF108036	7.66612e-33
					001555_1821_0562	Ovibos moschatus	AF538357	2.74308e-51
					000364_1402_3695	Equus caballus	X79547	2.51867e-45
						E hemionus	Z18645	2.51867e-45
					002974_1686_2896	Equus asinus	X97337	2.05062e-26
						Prionailurus bengalensis	AF006437	2.05062e-26
						Felis nigripes	AF006399	2.05062e-26
						E hemionus	Z18645	2.05062e-26
					001144_1359_1153	Monodon monoceros	AF334502	6.72516e-52
						Delphinapterus leucas	AF334501	6.72516e-52
					000769_1936_3573	Loxodonta africana	DQ316069	2.06811e-61
					009462_1862_0728	Capricornis sumatraensis	DQ989294	6.37417e-46
						Ovibos moschatus	AF538357	6.37417e-46
					001273_1371_0478	Panthera tigris	AY452109	4.58521e-53
						16S rRNA	S75063	4.58521e-53
						Felis catus	U20753	4.58521e-53
						Panthera leo	AF006457	4.58521e-53
						Leopardus wiedii	AF006423	4.58521e-53
						Oncifelis colocolo	AF006411	4.58521e-53
						Felis silvestris	AF006401	4.58521e-53
						Felis libyca	AF006395	4.58521e-53
						Felis chaus	AF006393	4.58521e-53
					001872_1636_1137	Equus caballus	X79547	2.72485e-48
						E hemionus	Z18645	2.72485e-48
					003489_1612_0541	Loxodonta africana	DQ316069	2.8774e-54
					004654_1840_1418	Ovibos moschatus	U87027	7.71569e-58
					008550_1924_2578	Canis lupus	DQ480508	4.77047e-53
						Canis familiaris	DQ480502	4.77047e-53
						Canis aureus	AY289969	4.77047e-53
					000195_1604_0282	Equus caballus	X79547	1.29001e-37
						E hemionus	Z18645	1.29001e-37
					000664_1889_3735	Aepyceros melampus	M86496	1.0057e-44
					003251_1854_2998	Hippopotamus amphibius	AJ010957	3.70824e-41
					000037_1113_3679	Syncerus caffer	U87061	1.56221e-46
					006102_1942_2267	Aepyceros melampus	M86496	5.00054e-56
					003518_1847_0501	Syncerus caffer	U87061	1.17213e-53
					003521_1932_0719	Rhinolophus alcyone	AY395858	1.31572e-28
					010103_1948_2340	Hylobates muelleri	AB050179	1.49342e-21
						Hylobates agilis	AB050174	1.49342e-21
					006416_1907_3626	Aepyceros melampus	M86496	3.87897e-22
					001080_1869_3495	Kobus ellipsiprymnus	U87015	2.89478e-57
					000337_1134_1885	Syncerus caffer	U87061	7.30367e-52
					009246_1859_2290	Ovibos moschatus	U87027	3.11471e-54
					000739_1874_0355	Hipposideros bicolor	AY606909	2.58852e-08
						Rhinolophus pumilus	AB061526	2.58852e-08
					005919_1815_3603	Ovibos moschatus	U87027	2.05128e-58
